# Supplementary material
Source: PubMed Central journal article supplement (PMC4844788)

# Supplementary Figure 1

Figure 1b

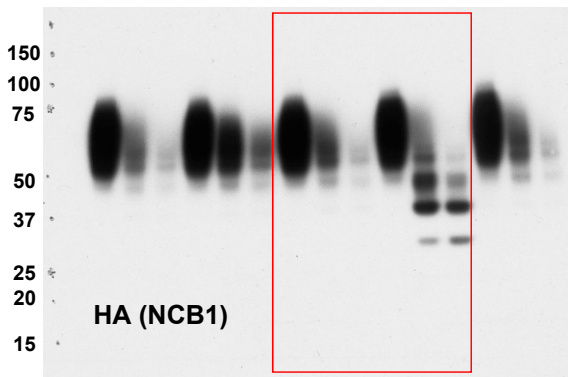

Figure 1c

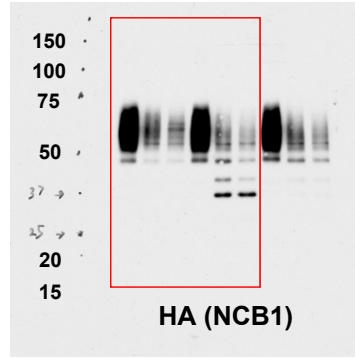

Figure 1d

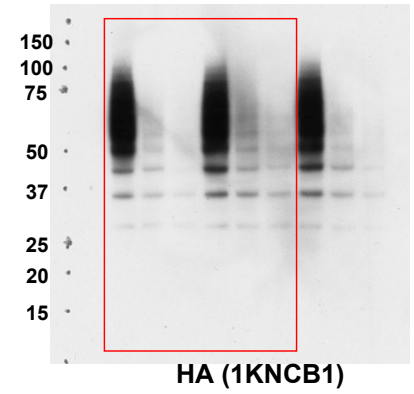

Figure 1e

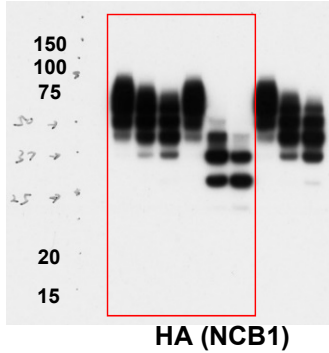

Figure 1f

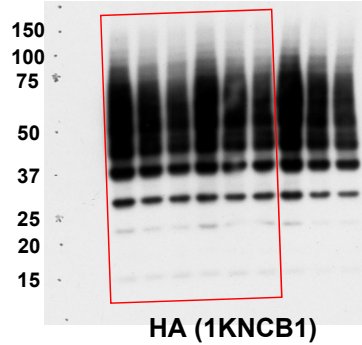

Figure 2a

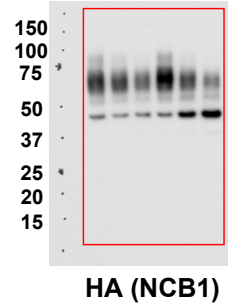

Figure 2b

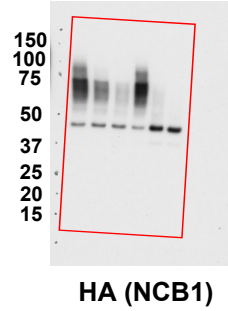

Figure 2c

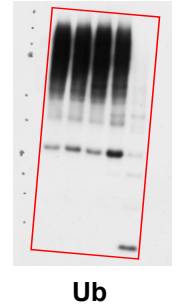

Figure 4a (left)

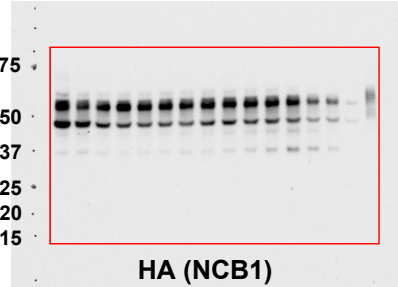

Figure 4a (right)

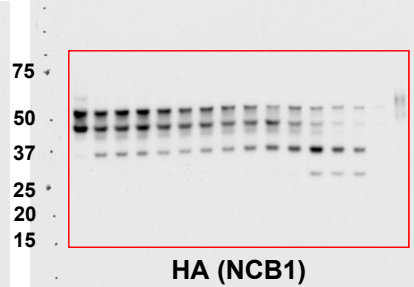

Ext Fig 1a

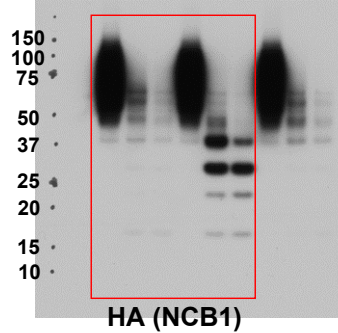

Ext Fig 1b

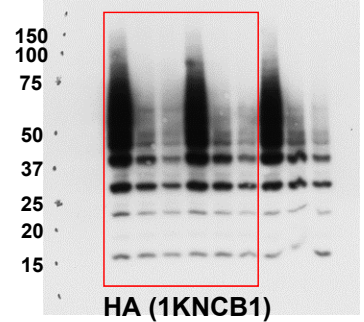

Ext Fig 1c

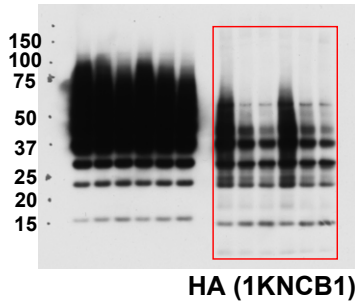

Ext Fig 1d

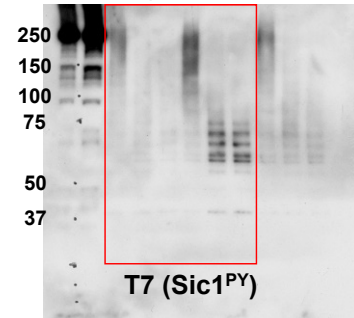

Ext Fig 1e

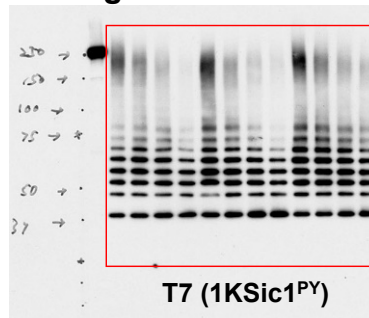

Ext Fig 1f

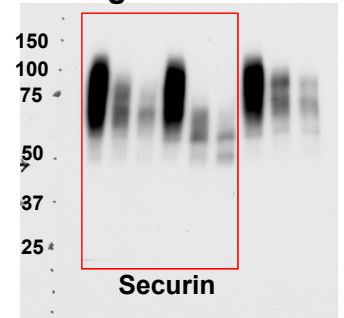

Ext Fig 2a (left)

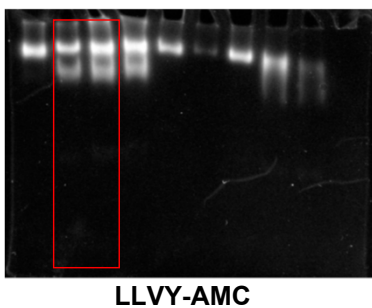

Ext Fig 2a (right)

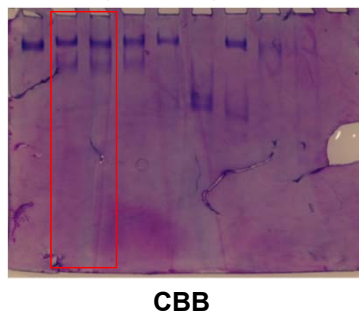

Ext Fig 2b

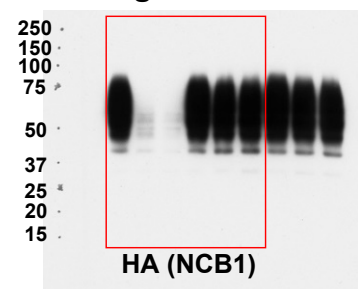

# Supplementary Figure 1

Ext Fig 3a

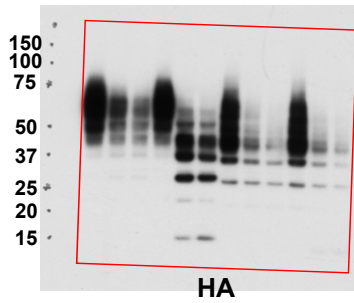

Ext Fig 3b

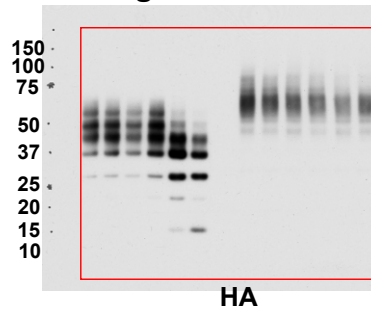

Ext Fig 3c

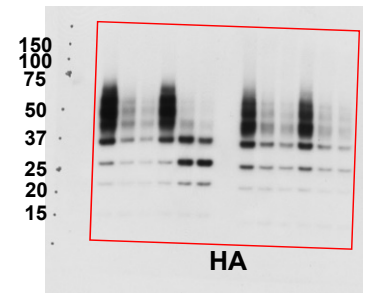

Ext Fig 4a

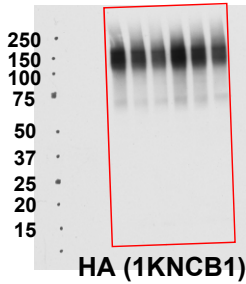

Ext Fig 4b

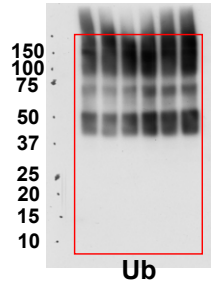

Ext Fig 4c

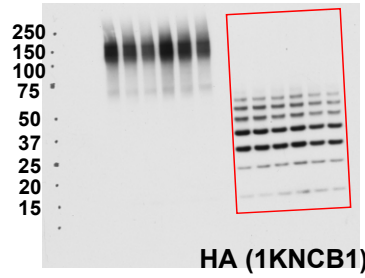

Ext Fig 4d (left)

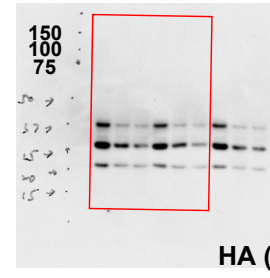

Ext Fig 4d (right)

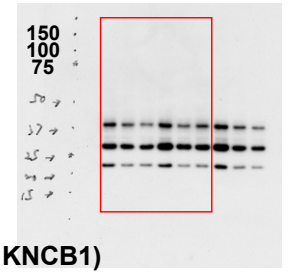

Ext Fig 4e (left)

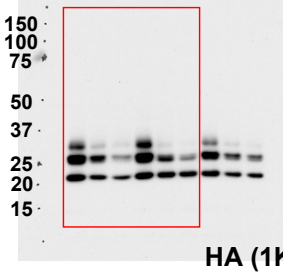

Ext Fig 4e (right)

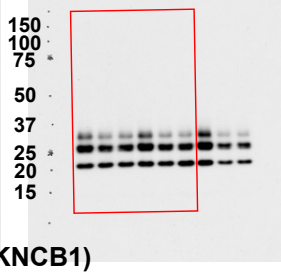

Ext Fig 5a

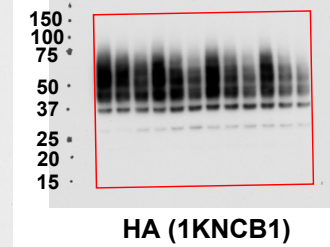

Ext Fig 5b

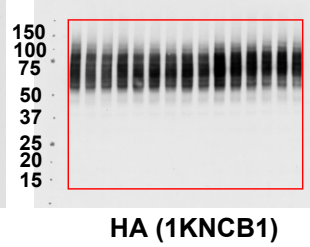

Ext Fig 5c

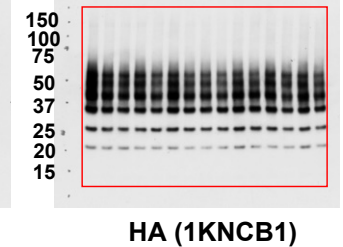

Ext Fig 6a

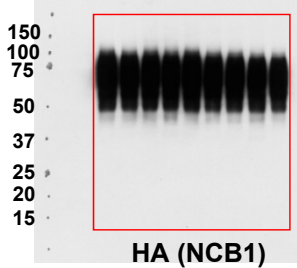

Ext Fig 6b

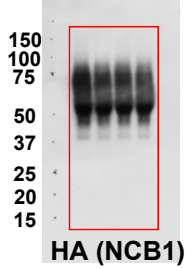

Ext Fig 6c

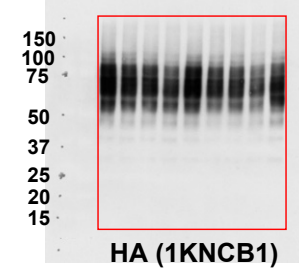

Ext Fig 6d

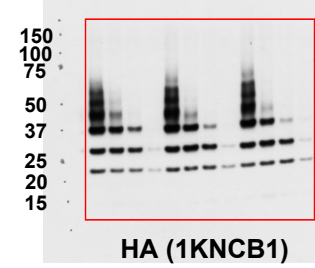

Ext Fig 7a (K63Ub<sub>2</sub>)

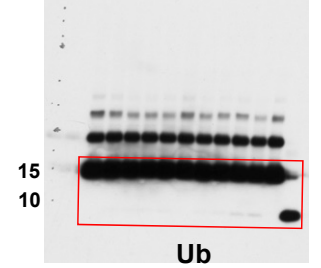

Ext Fig 7a (K63Ub<sub>4</sub>)

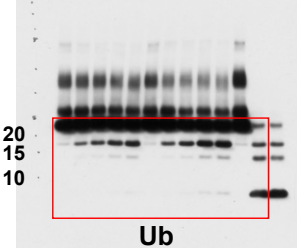

Ext Fig 7b (K48Ub<sub>2</sub>)

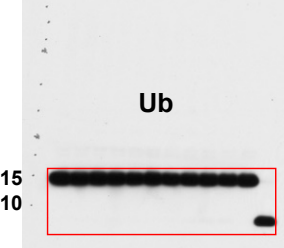

Ext Fig 7b (K48Ub<sub>4</sub>)

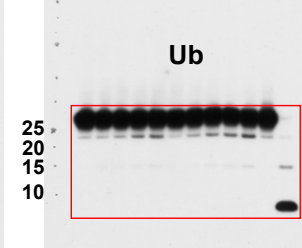

Ext Fig 7c

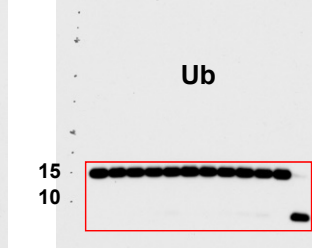

Ext Fig 7d

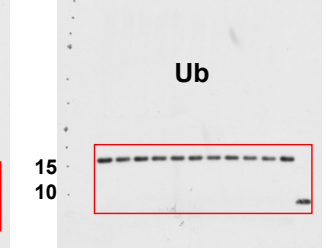

Ext Fig 7e

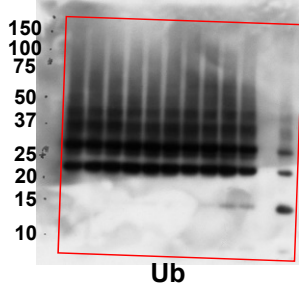

Ext Fig 7f

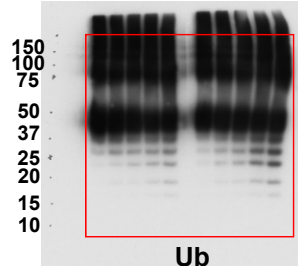

Ext Fig 8a

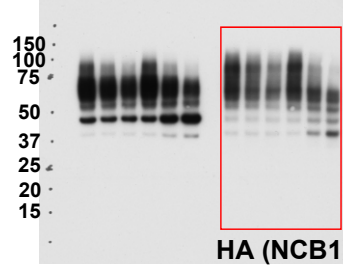

Ext Fig 8b

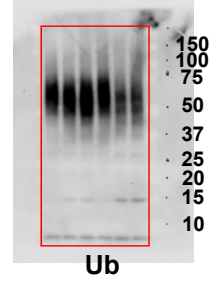

Supplement: NIHMS761032-supplement-1.pdf [file NIHMS761032-supplement-1.pdf]
